# Supplementary material for: Genetic polymorphisms identify in species/biovars of Brucella isolated in China between 1953 and 2013 by MLST
Source: PubMed Central journal article supplement (PMC5781281; doi:10.1186/s12866-018-1149-0), 2018-01-10

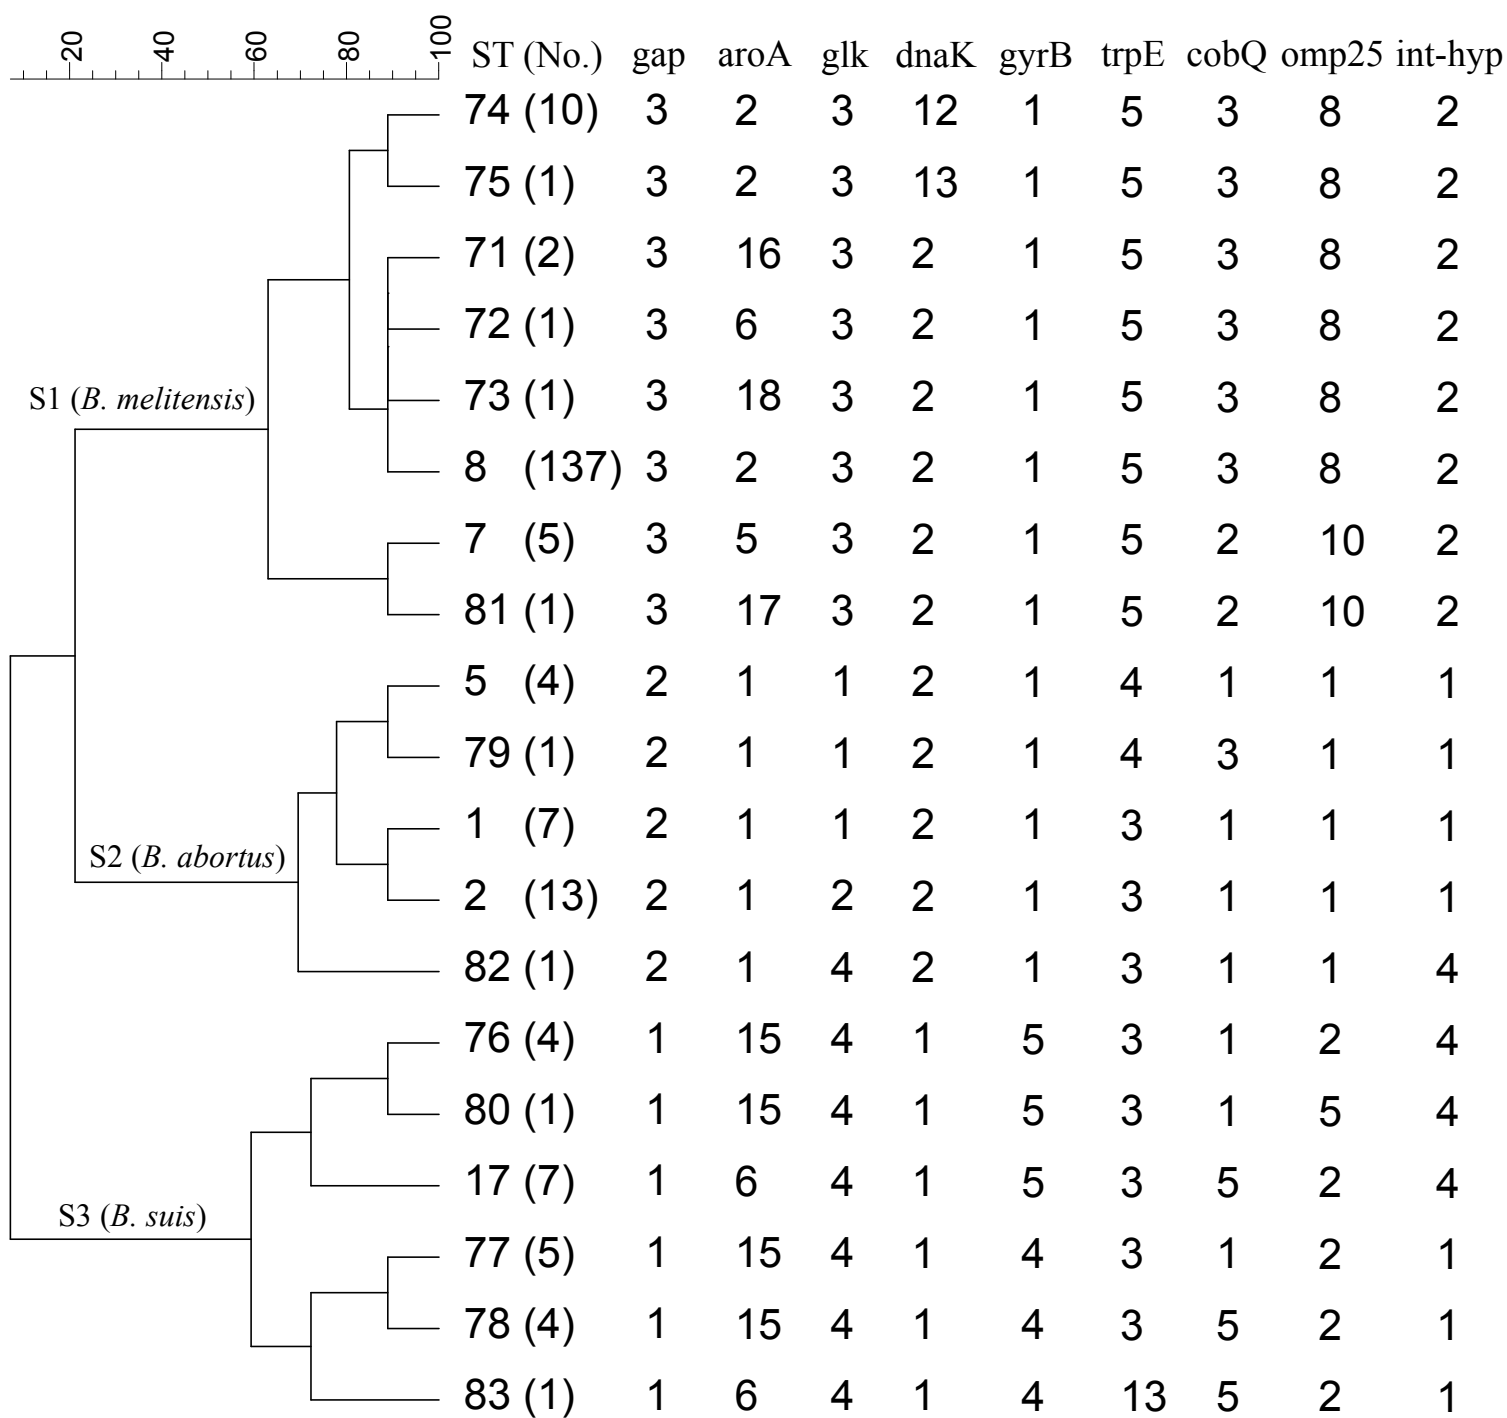

Supplement: 12866_2018_1149_MOESM3_ESM.pdf [file 12866_2018_1149_MOESM3_ESM.pdf]
